# Supplementary material for: Design of an ecological momentary assessment study of exposure to radiofrequency electromagnetic fields and non-specific physical symptoms
Source: HighWire-hosted journal article supplement (doi:10.1136/bmjopen-2013-002933), 2013-08-01
Supplement: bmjopen-2013-002933supp_appendix.pdf [file bmjopen-2013-002933supp_appendix.pdf]

## **APPENDIX 1**

The 12 frequency bands measured by the exposimeter are: FM radio (88–108 MHz), TV3 (174–223 MHz), TETRA (380– 400 MHz), TV4&5 (470–830 MHz), GSM uplink (880–915 MHz), GSM downlink (925–960 MHz), DCS uplink (1710–1785 MHz), DCS downlink (1805–1880 MHz), DECT (1880–1900 MHz), UMTS uplink (1920–1980 MHz), UMTS downlink (2110– 2170 MHz), and WiFi (2400–2500 MHz). The formerly TV3 and TV4&5 frequency bands are nowadays used for digital radio, Terrestrial Digital Audio Broadcasting (T-DAB), and digital TV, Digital Video Broadcasting Terrestrial (DVB-T), respectively. Uplink means that the signal is used for the contact from mobile phone to base station, downlink is from base station to mobile phone.
